# Supplementary material for: Complexities in Case Definition of SARS-CoV-2 Reinfection: Clinical Evidence and Implications in COVID-19 Surveillance and Diagnosis
Source: MDPI journal article supplement (doi:10.3390/pathogens10101262), 2021-09-29
Supplement: s1 [file s1]

Supplementary Figure S1. Flow chart for assessing SARS-CoV-2 reinfection [28].

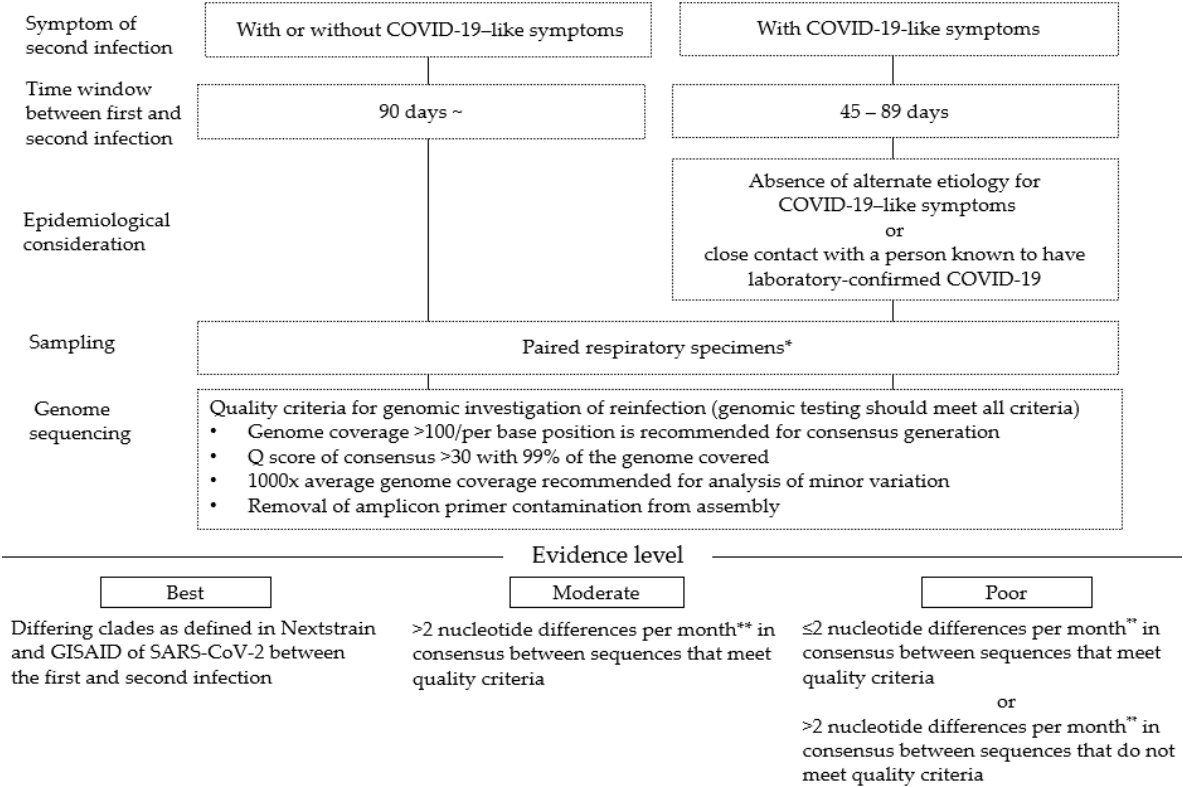

\* For real-time PCR, include if Ct value is <33. Higher Ct values may not yield optimal results for genome sequencing.

\*\* The mutation rate of SARS-CoV-2 is estimated at 2 nucleotide differences per month
